1 **Black sea cucumber (*Holothuria atra* Jaeger, 1833) protects *Caenorhabditis elegans***  
2 **against *Pseudomonas aeruginosa* infection**

3 **Wan-Ting Lee<sup>a</sup>, Boon-Khai Tan<sup>a</sup>, Su-Anne Eng<sup>b</sup>, Gan Chee Yuen<sup>c</sup>, Kit Lam Chan<sup>d</sup>,**  
4 **Yee Kwang Sim<sup>e</sup> Shaida Fariza Sulaiman<sup>b</sup> and Alexander Chong Shu-Chien<sup>a,b,f,\*</sup>**

5 <sup>a</sup>Malaysian Institute of Pharmaceuticals and Nutraceuticals (IPHARM), National Institute of  
6 Biotechnology Malaysia, Ministry of Energy, Science, Technology, Environment and  
7 Climate Change, Bukit Gambir, Malaysia; deniselwt@hotmail.com;  
8 tanboonkhai@gmail.com

9 <sup>b</sup>School of Biological Sciences, Universiti Sains Malaysia, 11800 Minden, Penang,  
10 Malaysia; [anne\\_es2810@hotmail.com](mailto:anne_es2810@hotmail.com); shaida@usm.my

11 <sup>c</sup>Analytical Biochemistry Research Centre, Universiti Sains Malaysia, 11800 Minden,  
12 Penang, Malaysia; cygan@usm.my

13 <sup>d</sup>School of Pharmaceutical Sciences, Universiti Sains Malaysia, 11800 Minden, Penang,  
14 Malaysia; klchan@usm.my

15 <sup>e</sup>Center for Marine and Coastal Studies, Universiti Sains Malaysia, 11800 Minden, Penang,  
16 Malaysia; mrsimyk@usm.my

17 <sup>f</sup>Centre for Chemical Biology, Sains@USM, Blok B No. 10, Persiaran Bukit Jambul, 11900  
18 Bayan Lepas, Penang, Malaysia

19 \* Correspondence: alex@usm.my; Tel: +6046535501

20 **Authors and respective contribution**

- 21 • **Wan-Ting Lee: Conducted killing assays, anti-virulence and gene expression**  
22 **studies, draft of manuscript**
- 23 • **Boon-Khai Tan: Involved in supervision of experiments involving *C. elegans***
- 24 • **Su-Anne Eng: Data analysis, manuscript preparation**
- 25 • **Gan Chee Yuen: Natural product extraction and fractionation**
- 26 • **Kit Lam Chan: Natural product extraction and fractionation**
- 27 • **Yee Kwang Sim: collection and handling of sea cucumbers**
- 28 • **Shaida Fariza Sulaiman: Identification of compounds, manuscript preparation**
- 29 • **Alexander Chong Shu-Chien: Overall design of studies, funding, flow of work,**  
30 **supervision of WT Lee, BK Tan, S Eng, draft and finalization of manuscript**

31

32

33 **Abstract:**

34 **Ethnopharmacological relevance:** Sea cucumbers are known to have beneficial effects  
35 towards many ailments. Among traditional documented use of edible sea cucumbers are  
36 as anti-infective tonic food. Metabolites with immunomodulatory properties have also  
37 been reported from temperate sea cucumber species. The black sea cucumber  
38 (*Holothuria atra*) is a widely distributed tropical marine sea cucumber species traditionally  
39 consumed by Asian populations for its medicinal values.

40 **Aim of the study:** A strategy to circumvent the problem of multidrug resistant  
41 *Pseudomonas aeruginosa* is discovery of novel anti-infectives targeting bacterial virulence  
42 or host immunity. This study aims to decipher the anti-infective properties of *H. atra*.

43 **Materials and methods:** Here, we utilized the *Caenorhabditis elegans*-*P. aeruginosa*  
44 infection model to assess the anti-infective properties of *H. atra*. We conducted the *C.*  
45 *elegans*-*P. aeruginosa* slow killing assay to isolate a fraction with capable of conferring  
46 survival to pathogen-infected worms, followed by a series of tests to assess the  
47 anti-virulence and immune-related properties of the sea cucumber bioactive fraction.

48 **Results:** The *H. atra* methanol extract improved survival of infected worms without  
49 affecting pathogen viability. Further extraction and assays sequestered a fraction with  
50 significant anti-infective activities and was able to attenuate the secretion of virulence  
51 factors and biofilm formation. Treatment of *P. aeruginosa*-infected transgenic *lys-7::GFP*  
52 worms with this fraction also restored the repressed expression of host *lys-7*, a defense  
53 enzyme. QTOF-LCMS analysis of this fraction revealed the presence of  
54 aspidospermatidine, an indole alkaloid and inosine.

55 **Conclusion:** Collectively, results shows that *H. atra* confers survival advantage against *P.*  
56 *aeruginosa* infection through inhibition of pathogen virulence and the restitution of host  
57 *lys-7* expression.

58 **Keywords:** *Pseudomonas aeruginosa*; *Caenorhabditis elegans*; *Holothuria atra*;  
59 anti-virulence; immunomodulator

60 **1. Introduction**

61 *Pseudomonas aeruginosa* is an opportunistic pathogen involved in urinary tract and  
62 bloodstream infection, nosocomial pneumonia and contamination of surgical sites (Driscoll  
63 et al., 2007; Taylor et al., 2014). Increasing number of antibiotic resistance *P. aeruginosa*  
64 strains are being reported globally (Yayan et al., 2015). Attempts to overcome bacteria  
65 resistance through modification of existing drugs or drug discovery are often ineffectual  
66 (Parisien et al., 2008). Collectively, these issues underscore the need for alternative  
67 therapies with different modes of targeting mechanism involving host immune response or

68 pathogen virulence. In comparison to direct killing of pathogens, these paths are projected to  
69 invoke milder evolutionary pressure responsible for resistance development (Allen et al.,  
70 2014).

71 The nematode *Caenorhabditis elegans* is a proven model for deciphering host–pathogen  
72 interactions due to its readiness for infection by numerous human pathogens (Moy et al.,  
73 2006). As a model organism, it is also supported by an array of tools useful for deciphering  
74 immunity related pathways (Aballay and Ausubel, 2002). The *C. elegans* host-pathogen  
75 interaction is a proven powerful platform for discovery of anti-infectives, and is frequently  
76 utilized to screen for novel anti-infectives against a myriad of pathogens, (Conery et al.,  
77 2014; Kim et al., 2017; Maria et al., 2017; Utari and Quax, 2013; Zhu et al., 2015). An  
78 advantage in having both host and pathogen in a screening assay is early detection of  
79 undesirable toxic properties in hit candidates (Squiban and Kurz, 2011).

80 The diverse marine environment impose the selection of an array of metabolites  
81 produced by an immeasurable source of organisms (Molinski et al., 2009). Secondary  
82 metabolites with anti-infective properties against *P. aeruginosa* have been identified from  
83 numerous marine organisms including marine bacteria and seaweeds (Fatin et al., 2017;  
84 Kandasamy et al., 2012; Kulshreshtha et al., 2016; Liu et al., 2013; Naik et al., 2013; Papa et  
85 al., 2015). . To date, the only published report of an anti-infective from marine invertebrates  
86 using the *C. elegans* platform is from a tropical mollusk (Kong et al., 2014).

87 The consumption of sea cucumber, a marine echinoderm as medicine can be traced back  
88 to medical records documented during the Ming Dynasty (Chen 2003). Sea cucumbers  
89 prepared for medicinal purposes are known as ‘gamat’ in Malaysia, with different forms of  
90 gamat being utilized for various types of ailments (Fredalina *et al.* 1999). From the  
91 estimated 1000 varieties of sea cucumbers worldwide, around 20 species have known  
92 ethnopharmacological values (Bordbar et al., 2011). Asians typically regard sea cucumbers  
93 as effective remedy of asthma, hypertension, joint pain, sprains intestinal and urinary  
94 problems (Chen, 2004; Dakrory et al., 2015). Correspondingly, studies on sea cucumber  
95 metabolites have reported multiple activities including anticancer, anticoagulant,  
96 anti-hypertension, anti-inflammatory, antimicrobial, antioxidant, antithrombotic,  
97 antihyperglycemic, anti-ageing and wound healing (Aminin et al., 2015; Bordbar et al., 2011;  
98 Janakiram et al., 2015; Jattujan et al., 2018; Mourão et al., 1998; Song, M. et al., 2013). These  
99 bioactivities are linked to a wide range of metabolites, such as triterpene glycosides, peptides,  
100 collagen, mucopolysaccharides, carotenoids, polyunsaturated fatty acids and phospholipids

101 (Aminin et al., 2015; Bahrami and Franco, 2016; Ibrahim, 2012; Saito et al., 2002; Shi et al.,  
102 2016).

103 *Holothuria atra* Jaeger 1833 (Holothuridae), colloquially known as black sea cucumber  
104 or lollyfish, is one of the most commonly found sea cucumber species in the Indo-Pacific  
105 region, dwelling in seagrass beds and rocky reefs (Conand, 2004). In Fiji, this species is  
106 traditionally cooked or marinated before consumption (Vuki and Viala, 1990). Among the  
107 many medicinal properties linked with sea cucumbers, sea cucumbers are also traditionally  
108 consumed for its immune boosting properties (Chen, 2004). In tandem, metabolites with *in*  
109 *vitro* or *in vivo* immunomodulatory activities have been isolated from several sea cucumber  
110 species (Aminin et al., 2016; Aminin et al., 2008; Aminin et al., 2006; Song, Y. et al., 2013).  
111 Therefore, sea cucumber is an opportune organism for discovery of novel and potent  
112 anti-infective entities. Using the *C. elegans* host-pathogen platform, we investigated the  
113 anti-infective properties of *H. atra*. Overall, we demonstrate the capacity of an extract from  
114 this sea cucumber in rescuing worms from a lethal *P. aeruginosa* infection. The capacity of  
115 *H. atra* metabolites in impeding the production of well-characterized *P. aeruginosa*  
116 virulence factors and boosting an immune-related gene were also studied.

## 117 **2. Materials and Methods**

### 118 *2.1. Bacterial and Nematode Strains*

119 *P. aeruginosa* strain PA14 (Rahme et al., 1995), which is rifampicin-resistant, was  
120 grown in King's B broth supplemented with rifampicin (100 µg/mL) while the  
121 streptomycin-resistant *E. coli* strain OP50 (Brenner, 1974) was cultured in Luria Bertani  
122 (LB) broth with streptomycin (100 µg/mL). Cultures were grown overnight with aeration at  
123 37°C. The wild type *C. elegans* Bristol N2 (N2) and transgenic *lys-7::GFP* worm strain  
124 SAL105 were obtained from the *Caenorhabditis* Genetics Center (CGC), USA, with growth  
125 and handling as described elsewhere (Alper et al., 2007; Brenner, 1974).

126

### 127 *2.2. Preparation of Holothuria atra extract*

128 *Holothuria atra* was collected from Pulau Songsong Kedah situated at the northern  
129 region of Peninsular Malaysia (N5°48'33.72" E100°17'32.63") and authenticated by the  
130 Centre for Marine and Coastal Studies, Universiti Sains Malaysia. Samples were stored at  
131 -20°C until further processing. Frozen samples were cleaned with distilled water, sliced into

132 smaller pieces and freeze-dried for about 5-7 days. Dried samples were extracted with either  
133 methanol or acetone, followed by 15 minutes of sonication at room temperature and lastly,  
134 filtration with Whatman filter paper No. 1. Extraction procedure was repeated thrice.  
135 Filtrates were then concentrated using a rotary evaporator at 39°C. All dried extracts were  
136 kept at -20°C before dilution in DMSO at 20mg/mL, followed by storage at 4°C.  
137 Depending on assays, the extract stock solution is further diluted to achieve the desired  
138 concentrations.

### 139 2.3. *C. elegans* Survival Assay

140 The slow killing assay was performed according to the protocol described elsewhere  
141 (Dharmalingam et al., 2012). PA14 cultured overnight on King's B broth was evenly spread  
142 on Pseudomonas Infection Agar (PIA) assay plates supplemented with natural products,  
143 followed by incubation at 37°C for 24 hours to allow growth of PA14. Triplicate plates  
144 containing 50-60 young adult worms each were used. At least three independent repeats were  
145 performed.

146 Percentage survival of the infected worm population was determined after 48 hours of  
147 incubation at 25°C. DMSO (0.5%) and curcumin (100 µg/mL), a known anti-infective agent,  
148 was used as negative and positive control, respectively. (Rudrappa and Bais, 2008).

### 149 2.4. Antimicrobial Test

150 The minimum inhibitory concentration (MIC) broth microdilution antimicrobial test was  
151 carried out to determine bactericidal activities of natural product. Stock solution of extracts  
152 or fractions were further diluted in DMSO to achieve concentration ranging from 25 µg/mL  
153 to 1000 µg/mL. Overnight culture of *P. aeruginosa* PA14 was adjusted to 0.5 McFarland  
154 standard turbidity and diluted to 1:20. A total of 10 µL of inoculum was added into the wells,  
155 followed by incubation at 37°C for 24 hours. Streptomycin (100 µg/mL) and DMSO (0.5%)  
156 were also tested as positive and negative controls, respectively.

### 157 2.5. Bacterial Growth Assay

158 The assay was conducted with similar preparations as the MIC broth microdilution test.  
159 Upon inoculum addition, the well plate was incubated at 37°C with aeration and bacterial cell  
160 density was measured at OD<sub>600</sub> every 2 hours.

### 161 2.6. Liquid-liquid Partitioning of Methanolic *H. atra* Extract

162 The methanol extract was subjected to liquid-liquid chromatography, to separate  
163 compounds according to polarity. The extract was suspended in distilled water and  
164 subsequently partitioned with butanol. The partition was collected and dried with a rotatory  
165 evaporator, followed by storage at -20°C. Stock solution for the partition was prepared in  
166 DMSO and stored at 4°C.

#### 167 2.7. Fractionation of *H. atra* Butanol Partition

168 The butanol partition was column chromatographed over silica gel 60 (70-230 mesh) and  
169 eluted stepwise from 100:0:1 to 0:100:1 with the chloroform:methanol:water solvent system  
170 at ratio of 80:20:1. The process was repeated until sufficient fractions were obtained for  
171 further analysis.

#### 172 2.8. Virulence Factors and Biofilm Production Assays

173 Protease and elastase activity assays were performed as described elsewhere, with minor  
174 modifications (Prithiviraj et al., 2005). Briefly, *P. aeruginosa* PA14 was grown in the  
175 presence of bioactive fraction at 200 µg/mL or DMSO (0.5%) for 24 hours at 37°C. The  
176 supernatants were collected and filtered with a 0.22 µm nylon filter. Reaction mixture  
177 consisting of 0.8% azocasein in 500 µL of 50mM K<sub>2</sub>HPO<sub>4</sub> (pH7) and 100 µL of the purified  
178 supernatant were incubated at 25°C for 3 hours. A total of 0.5 mL of 1.5M HCl was added  
179 into the reaction, followed by placement on ice for 30 minutes and centrifugation. After the  
180 addition of 0.5 mL 1M NaOH, the absorbance was measured at 400nm (SpectraMax M5).

181 As for elastase activity, 100 µL of the purified supernatant described above was added  
182 into tubes pre-prepared with 1 mL of 10mM Na<sub>2</sub>HPO<sub>4</sub> and 20 mg of elastin-Congo red. The  
183 mixtures were then incubated at 37°C for 4 hours with agitation. After the incubation, the  
184 mixtures were centrifuged at 14 000 rpm for 10 minutes and absorbance determined at  
185 495nm.

186 The pyocyanin quantification assay was conducted as described (Essar et al., 1990). *P.*  
187 *aeruginosa* PA14 was grown in the presence of bioactive fraction for up to 24 hours at 37°C.  
188 Cultures were collected at 6, 12 and 24 hours after treatments and centrifuged. A total of 3  
189 mL chloroform was then added into the resulting supernatant, vortexed briefly and  
190 centrifuged for 10 minutes at 10 000 rpm. The bottom blue layer was isolated, and the  
191 extraction processes were repeated using 1.5 mL of 1M HCl. The absorbance at 520 nm of

192 the pink layer was measured. Pyocyanin concentration was determined by multiplying the  
193 absorbance value with 17.072.

194 A microtiter biofilm formation assay was used to determine the effect of *H. atra* fraction  
195 on *P. aeruginosa* PA14 biofilm formation (O' Toole, 2011). *P. aeruginosa* PA14 was grown  
196 overnight followed by dilution to 1:100. A total of 100  $\mu$ L of the inoculum was added into 96  
197 wells plate preseeded with *H. atra* fraction or 0.5% DMSO. The plate was then incubated for  
198 24 hours at 37°C. Liquid and cells were discarded, followed by rinsing of plate with distilled  
199 water. For visualisation, 125  $\mu$ L of 0.1% crystal violet solution was added into each well,  
200 followed by incubation for 15 minutes at room temperature. Excessive stain was washed off  
201 with water and wells left air-dried for 2 hours. Stained biofilm was treated with 125  $\mu$ L of  
202 30% acetic acid followed by 10-15 min incubation. A total of 125  $\mu$ L of solubilized crystal  
203 violet was transferred into a new microtiter for measurement at 550 nm .

#### 204 2.9. Visualization of Transgenic *lys-7::GFP* *C. elegans*

205 Transgenic *C. elegans lys-7::GFP* strain SAL105 were exposed *P. aeruginosa* PA14 in  
206 the presence or absence of *H. atra* fractions as described in the slow killing assay. The  
207 fluorescence intensities of young adult worms at 12 hpi for all the experimental conditions  
208 were visualized using Leica Microsystem M205 FA microscope and digitally captured with  
209 Leica DFC310 FX camera (60x magnification)

#### 210 2.10. Real-time PCR based quantification of *lys-7* expression in *C. elegans*

211 Primers were designed accordingly for the amplification of *C. elegans lys-7* and  
212 pan-actin as housekeeping gene. Total RNA was treated with RNase-free DNase (Promega,  
213 USA) for removal of genomic DNA. PCR optimization and amplification was performed  
214 under condition described previously (Dharmalingam et al., 2012). Melt curve analysis was  
215 performed to ensure the specificity of the PCR products. Quantitative expression of *lys-7*  
216 was calculated using CFX Manager software (BioRad, USA) by normalizing its level to  
217 housekeeping gene. Three independent replicates were performed for each analysis.

#### 218 2.11. Chemical Profiling of Fractions

219 Compounds identification of both the *H. atra* active fractions were performed using the  
220 Agilent 6520 accurate-mass quadrupole time-of-flight liquid chromatography mass  
221 spectroscopy (QTOF-LCMS). Zorbax SB-C18 column (1.5 $\mu$ m particle size, 0.5x150mm)  
222 was used and separation was achieved with a 22.5 minutes gradient of 3-90% acetonitrile,



223 followed by 3% acetonitrile for 10 minutes at a flow rate of 20  $\mu$ L/min. Solvents contained  
224 0.1% formic acid. The compound prediction was achieved by comparing the obtained  
225 individual MS/MS fingerprinting spectrum with METLIN, MassBank and Chemspider  
226 databases.

## 227 2.12. Statistical Analysis

228 Data were analyzed using Student's *t*-test whereby in all comparisons,  $p < 0.05$ ,  $p < 0.01$   
229 and  $p < 0.001$  were accepted as statistically significant.

230

## 231 3. Results

### 232 3.1. *H. Atra* Promotes Survival of *P. aeruginosa* PA14 Infected *C. elegans* Without 233 Displaying Any Direct Bactericidal Effect

234 The slow-killing assay showed methanol extract of *H. atra* causing a significantly higher  
235 percentage of worm survival ( $60.21 \pm 6.7\%$ ) at 48 hours after treatment, which is comparable  
236 to value obtained with curcumin ( $60.68 \pm 8.6\%$ ), a known anti-infective against PA14  
237 infection (Figure 1). A lower percentage of survival ( $56 \pm 7.6\%$ ) was obtained with acetone  
238 extract of *H. atra*.

239 Next, we determined the bactericidal effect of the methanol extract on *P. aeruginosa*  
240 PA14. Extract concentrations ranging from 25  $\mu$ g/mL to 1000  $\mu$ g/mL did not reduce *P.*  
241 *aeruginosa* PA14 growth, as compared to streptomycin at 100  $\mu$ g/mL (Supplementary 1).  
242 This extract was also non-detrimental towards the growth kinetic of *P. aeruginosa* PA14, as  
243 no significant difference was observed between *H. atra* and DMSO exposed bacteria  
244 population (Figure 2).

245 The lethality of *P. aeruginosa* PA14 infection in the slow killing assay involves the  
246 colonization of *C. elegans* intestinal tract (Tan et al., 1999). Therefore, we ascertain if the  
247 improved survival of worms treated with extract is an outcome of reduced worm feeding  
248 activities. We observed the worm pharyngeal pumping rate, a reliable indicator of  
249 bacterial feeding in this species (Kong et al., 2014). Results show no significant difference  
250 in feeding activities between OP50 fed worms and untreated PA14 fed worms, 0.5%  
251 DMSO treated PA14 fed worms or *H. atra* methanol treated PA14 fed worms, respectively



252 (Figure 3). Therefore, worms exposed *H. atra* methanol extract still display normal  
253 feeding activities, leading to colonization of gut by PA14.

254 Column chromatography fractionation of the *H. atra* butanol partition resulted in 9  
255 fractions (F1-F9). Based on the slow-killing assay, fractions F2 ( $55.37 \pm 8.4\%$ ), F3 ( $64.05 \pm$   
256  $8.8\%$ ), F4 ( $52.75 \pm 6.3\%$ ) and F9 ( $52.00 \pm 8.0\%$ ) resulted in significantly higher worm  
257 survival as compared to 0.5% DMSO treatment (Figure 4a). Fraction F3 also did not appear  
258 to perturb *P. aeruginosa* PA14 growth (Figure 4b).

259 Dose dependent assay for fraction F3 showed that 200  $\mu\text{g/mL}$  was the minimal  
260 concentration resulting in significantly highest percentage of worm survival, comparable to  
261 value obtained with curcumin (Figure 5). At higher concentrations, a decreasing trend of  
262 survival rates was observed.

### 263 3.2. *H. atra* fraction Inhibits the Production of *P. aeruginosa* PA14 Elastase, Protease, 264 Pyocyanin and Formation of Biofilm

265 In comparison with 0.5% DMSO, treatment of *P. aeruginosa* PA14 with F3 significantly  
266 suppressed the production of elastase and protease at 24 hr after treatment (Figure 6a).  
267 Formation of biofilm in microtiter plate was also attenuated with F3. As for pyocyanin,  
268 significant reduction in pyocyanin production was obtained at 6 and 12 hr after incubation,  
269 respectively, but not 24 hr. (Figure 6b).

270

### 271 3.3. *H. atra* Induces the Expression of *C. elegans* Immune Effector *lys-7* in PA14 Infected 272 Worms

273 At 12 hr after infection, GFP intensity of *P. aeruginosa* PA14 infected worms was lower  
274 than uninfected worms, indicating diminished *lys-7* expression (Figure 7a,b). Treatment  
275 with *H. atra* restored *lys-7* expression to a level comparable with uninfected worms (Figure  
276 7c). Correspondingly, qPCR analysis of *lys-7* in worms also showed higher expression  
277 levels in worms exposed to F3 at 12 or 24 hours after treatment (Figure 7d). *H. atra* fraction  
278 also resulted in higher *lys-7* expression as compared to curcumin.

### 279 2.4. Tentative identification of major compound in *H. atra* F3 and F4 Fractions

280 QTOF-LCMS separation detected two major peaks in F3 at Retention Times ( $R_T$ ) 17.764  
281 min and 18.395. The compounds were identified using an HR MS (accurate mass in

282 negative mode) and HR MS/MS spectra (fragmentation) that matched with METLIN,  
283 MassBank and Chemspider databases. From the accurate mass analysis (Table 1), the  
284 molecular formula was calculated as  $C_{18}H_{22}N_2$  and  $C_{10}H_{12}N_4O_5$ , respectively. The  
285 compounds were putatively identified as aspidospermatidine and inosine.

#### 286 **4. Discussion**

287 An ongoing strategy to overcome the problem of drug-resistant pathogens is discovery  
288 of anti-infective activity, which either disrupt virulence-related pathways (Clatworthy et al.,  
289 2007) or boost host immunity (Hamill et al., 2008). Marine natural products with  
290 anti-virulence (Naik et al., 2013; Papa et al., 2015) or immunomodulatory properties  
291 (Kandasamy et al., 2012) have been reported. Among edible marine organisms, sea  
292 cucumber is regarded as a potent source of novel entities useful for both nutraceutical and  
293 pharmaceutical industries. There is an increasing reports of bioactivities from *H. atra*, a  
294 widely distributed tropical sea cucumber species. This includes antibacterial, antifungal,  
295 anti-proliferative, anti-apoptotic and antioxidant properties (Dakrory et al., 2015;  
296 Dhinakaran and Lipton, 2014; Dhinakaran and Lipton, 2015; Esmat et al., 2013; Nishikawa  
297 et al., 2015; Ridzwan et al., 1995; Saad et al., 2016).

298 Our results identified a sea cucumber *H. atra* methanol extract with capacity to confer  
299 survival in *P. aeruginosa* PA14-infected *C. elegans*. This extract does not possess direct  
300 bactericidal activity nor impedes growth of *P. aeruginosa* PA14, which rules out bacteria  
301 mortality as reason for improved worm survival. It was previously reported that a methanol  
302 extract of *H. atra* did not exert any bactericidal effect on several pathogenic bacteria species,  
303 including *P. aeruginosa* (Lawrence et al., 2010). Taken together with other investigations, *H.*  
304 *atra* bioactivities is therefore dependent on extraction solvent and target pathogen species  
305 (Abraham et al., 2002; Ibrahim, 2012). Further separation of the *H. atra* methanol extract  
306 yielded a fraction with similar bioactive properties. The range of worm survival obtained  
307 with this fraction is comparable to levels using a similar slow-killing assay where infected  
308 worms were treated with a terrestrial plant seed extract (Dharmalingam et al., 2012) or  
309 curcumin (Rudrappa and Bais, 2008). These levels however, are lower than a fraction  
310 isolated from a tropical marine actinomycete (Fatin et al., 2017).

311 In order to further understand the mechanisms responsible for the survival of infected  
312 worms, we assessed the effect of *H. atra* towards several *P. aeruginosa* PA14 virulence

313 factors. Although the complete spectrum of the pathogenesis of *C. elegans*-*P. aeruginosa*  
314 slow killing assay is not fully understood, the involvement of multiple virulence factors such  
315 as pyocanin, pyoverdine, various proteases, elastase, phospholipase and exotoxin is  
316 canonical (Kipnis et al., 2006; Rahme et al., 1995; Tan et al., 1999). Our results indicate *H.*  
317 *atra* lowered proteolytic and elastolytic activities, diminished the production of pyocyanin  
318 and the formation of biofilm, collectively signifying attenuation of *P. aeruginosa* PA14  
319 virulence. In addition, the collective mitigation of these virulence factors suggests a possible  
320 interference of PA14 quorum sensing (QS) by *H. atra* metabolites. QS have been  
321 corroborated as one of the crucial factor responsible for host mortality in the *C. elegans* slow  
322 killing assay (Papaioannou et al., 2009). Elsewhere, a marine seaweed extract was reported to  
323 repress *P. aeruginosa* QS genes, leading to diminished production of virulence factors and  
324 survival of infected worms (Kulshreshtha et al., 2016). Future work should ascertain the  
325 capacities of *H. atra* metabolites in interfering with pivotal elements of the *P. aeruginosa*  
326 QS.

327 The bioactive fraction was also able to restore the expression of *lys-7*, which encodes an  
328 immune-specific lysozyme which facilitates the clearance of bacterial infection through  
329 disruption of bacterial cell wall peptidoglycans (Evans et al., 2008; Mallo et al., 2002). Two  
330 plausible reasons could explain the restitution of *lys-7*. A known characteristic of *P.*  
331 *aeruginosa* infection in *C. elegans* is the suppression of host *lys-7* through the subversion of  
332 the DAF-2/DAF-16 insulin-like signaling pathway, leading to the downstream  
333 transcriptional suppression of several antimicrobial factors, including *lys-7* (Evans et al.,  
334 2008; Garsin et al., 2003; Murphy et al., 2003). Since the *H. atra* F3 fraction could mutually  
335 reduce the production of virulence factors and restore expression of *lys-7* in infected worms,  
336 it is possible that the latter observation is a consequence of halting the *P. aeruginosa*  
337 virulence activities upstream of the DAF2-DAF16 pathway. This would mimic the effects  
338 exerted by a marine brown seaweed extract in overcoming the pathogenicity of PA14  
339 towards *C. elegans* (Kandasamy et al., 2012). Alternately, *H. atra* could also contain  
340 compounds capable of directly inducing *lys-7* activities, as reported elsewhere (Fatin et al.,  
341 2017; Li et al., 2014).

342 Compounds with immunomodulatory activities have been isolated from edible sea  
343 cucumber species such as *Cucumaria japonica*, *C. frondosa* and *Stichopus japonicus*  
344 (Aminin et al., 2016; Aminin et al., 2008; Aminin et al., 2006; Song, Y. et al., 2013).  
345 Among these anti-infective molecules, polysaccharides are the most studied group (Kale et

346 al., 2013; Song, Y. et al., 2013; Wang et al., 2017). In addition, some triterpene glycosides,  
347 which are prominent secondary metabolites in sea cucumbers, also possessed  
348 immune-boosting effects (Bahrami and Franco, 2016). Two examples, cucumariosides and  
349 frondoside, were also reported to promote cellular immunity through stimulation of  
350 phagocytosis and lysosomal activities (Aminin et al., 2016; Aminin et al., 2001; Aminin et  
351 al., 2008). In our case, the main constituents detected in the bioactive *H. atra* fraction are  
352 aspidospermatidine and inosine. Aspidospermatidine is an indole alkaloid, a large and  
353 growing group of potentially useful marine-based metabolites (Netz and Opatz, 2015).  
354 Elsewhere, alkaloids have been identified in *H. atra* extract (Dhinakaran and Lipton, 2014).  
355 Indole and its derivatives have been demonstrated to repress the *P. aeruginosa* QS system,  
356 leading to diminished production of protease, pyocyanin and biofilm (Kim and Park, 2013;  
357 Lee et al., 2009; Lee et al., 2012). Inosine, a deaminated product of adenosine, was initially  
358 speculated as not having useful biological effects (Hasko et al., 2004). However, various  
359 studies have highlighted immunomodulatory and neuroprotective properties in inosine  
360 (Benowitz et al., 2002; Chen et al., 2002; Jin et al., 1997).

## 361 **5.0 Conclusion**

362 In conclusion, we propose that *H. atra* has anti-infective properties against *P.*  
363 *aeruginosa*. A bioactive fraction of this sea cucumber species inhibits the production of  
364 pathogen virulence factors. Concomitantly, *H. atra* also restored the expression level of host  
365 *lys-7*. High levels of an indole alkaloid and inosine were detected in this bioactive fraction.

366

367 **Acknowledgments:** We thank Universiti Sains Malaysia for postdoctoral appointment for  
368 Su-Anne E. Wan-Ting L. was supported by the MyBrain15 Scholarship from the Ministry  
369 of Education, Malaysia. This work was supported by the Malaysia Ministry of Science,  
370 Technology and Innovation under the IPHARM Flagship Research Grant 'Development of  
371 Nutraceutical and Pharmaceutical Products for Therapeutic Indications of High Burden to  
372 Malaysia' [Grant Number 304/PBIOLOGI/650869/K105].

373

## 374 **References**

375 Aballay, A., Ausubel, F.M., 2002. *Caenorhabditis elegans* as a host for the study of host-pathogen  
376 interactions. *Curr Opin Microbiol* 5(1), 97-101.

- 377 Abraham, T., Nagarajan, J., Shanmugam, S., 2002. Antimicrobial substances of potential biomedical  
378 importance from holothurian species. *Indian J. Mar. Sci.* 31(2), 161-164.
- 379 Allen, R.C., Papat, R., Diggle, S.P., Brown, S.P., 2014. Targeting virulence: can we make  
380 evolution-proof drugs? *Nat Rev Microbiol* 12(4), 300-308.
- 381 Alper, S., McBride, S.J., Lackford, B., Freedman, J.H., Schwartz, D.A., 2007. Specificity and  
382 complexity of the *Caenorhabditis elegans* innate immune response. *Mol. Cell. Biol.* 27(15),  
383 5544-5553.
- 384 Aminin, D., Pisyagin, E., Astashev, M., Es'kov, A., Kozhemyako, V., Avilov, S., Zelepuga, E.,  
385 Yurchenko, E., Kaluzhskiy, L., Kozlovskaya, E., Ivanov, A., Stonik, V., 2016. Glycosides from  
386 edible sea cucumbers stimulate macrophages via purinergic receptors. *Sci. Rep.* 6, 39683.
- 387 Aminin, D.L., Agafonova, I.G., Berdyshev, E.V., Isachenko, E.G., Avilov, S.A., Stonik, V.A., 2001.  
388 Immunomodulatory Properties of Cucumariosides from the Edible Far-Eastern Holothurian  
389 *Cucumaria japonica*. *J. Med. Food* 4(3), 127-135.
- 390 Aminin, D.L., Agafonova, I.G., Kalinin, V.I., Silchenko, A.S., Avilov, S.A., Stonik, V.A., Collin,  
391 P.D., Woodward, C., 2008. Immunomodulatory Properties of Fronodoside A, a Major Triterpene  
392 Glycoside from the North Atlantic Commercially Harvested Sea Cucumber *Cucumaria frondosa*. *J.*  
393 *Med. Food* 11(3), 443-453.
- 394 Aminin, D.L., Menchinskaya, E.S., Pislugin, E.A., Silchenko, A.S., Avilov, S.A., Kalinin, V.I.,  
395 2015. Anticancer activity of sea cucumber triterpene glycosides. *Mar. Drugs* 13(3), 1202-1223.
- 396 Aminin, D.L., Pinegin, B.V., Pichugina, L.V., Zaporozhets, T.S., Agafonova, I.G., Boguslavski,  
397 V.M., Silchenko, A.S., Avilov, S.A., Stonik, V.A., 2006. Immunomodulatory properties of  
398 Cumaside. *Int. Immunopharmacol.* 6(7), 1070-1082.
- 399 Bahrami, Y., Franco, C.M., 2016. Acetylated Triterpene Glycosides and Their Biological Activity  
400 from Holothuroidea Reported in the Past Six Decades. *Mar. Drugs* 14(8).
- 401 Benowitz, L.I., Goldberg, D.E., Irwin, N., 2002. Inosine stimulates axon growth in vitro and in the  
402 adult CNS, in: McKerracher, L., Doucet, G., Rossignol, S. (Eds.), *Progress in Brain Research*.  
403 Elsevier, pp. 389-399.
- 404 Bordbar, S., Anwar, F., Saari, N., 2011. High-value components and bioactives from sea cucumbers  
405 for functional foods--a review. *Mar. Drugs* 9(10), 1761-1805.
- 406 Brenner, S., 1974. The genetics of *Caenorhabditis elegans*. *Genetics* 77(1), 71-94.
- 407 Chen, J., 2004. Present status and prospects of sea cucumber industry in China, in: A., L., C., C., S.,  
408 P., S., U., J.-F., H., Mercier, M. (Eds.), *Advances in sea cucumber aquaculture and management*.  
409 FAO Rome, pp. 25-38.
- 410 Chen, P., Goldberg, D.E., Kolb, B., Lanser, M., Benowitz, L.I., 2002. Inosine induces axonal rewiring  
411 and improves behavioral outcome after stroke. *Proc. Natl. Acad. Sci. U.S.A.* 99(13), 9031-9036.
- 412 Clatworthy, A.E., Pierson, E., Hung, D.T., 2007. Targeting virulence: a new paradigm for  
413 antimicrobial therapy. *Nat Chem Biol* 3(9), 541-548.
- 414 Conand, C., 2004. Present status of world sea cucumber resources and utilization: an international  
415 overview, in: A., L., C., C., S., P., S., U., J.-F., H., A., M. (Eds.), *Advances in sea cucumber*  
416 *aquaculture and management*. Fisheries Technical Paper No. 463. FAO, Rome, pp. 13-24.
- 417 Conery, A.L., Larkins, Ford, J., Ausubel, F.M., Kirienko, N.V., 2014. High-Throughput Screening  
418 for Novel Anti-Infectives Using a *C. elegans* Pathogenesis Model. *Curr. Protocols Chem. Biol* 6(1),  
419 25-37.

- 420 Dakrory, A.I., Fahmy, S.R., Soliman, A.M., Mohamed, A.S., Amer, S.A.M., 2015. Protective and  
421 Curative Effects of the Sea Cucumber *Holothuria atra* Extract against DMBA-Induced Hepatorenal  
422 Diseases in Rats. Biomed Res. Int. 2015, 11.
- 423 Dharmalingam, K., Tan, B.-K., Mahmud, M.Z., Sedek, S.A.M., Majid, M.I.A., Kuah, M.-K.,  
424 Sulaiman, S.F., Ooi, K.L., Khan, N.A.K., Muhammad, T.S.T., Tan, M.-W., Shu-Chien, A.C., 2012.  
425 *Swietenia macrophylla* extract promotes the ability of *Caenorhabditis elegans* to survive  
426 *Pseudomonas aeruginosa* infection. J. Ethnopharmacol. 139(2), 657-663.
- 427 Dhinakaran, D.I., Lipton, A.P., 2014. Bioactive compounds from *Holothuria atra* of Indian ocean.  
428 Springerplus 3, 673.
- 429 Dhinakaran, D.I., Lipton, A.P., 2015. Antitumor and antifungal activities of organic extracts of sea  
430 cucumber *Holothuria atra* from the southeast coast of India. J. Ocean U. China 14(1), 185-189.
- 431 Driscoll, J.A., Brody, S.L., Kollef, M.H., 2007. The epidemiology, pathogenesis and treatment of  
432 *Pseudomonas aeruginosa* infections. Drugs 67(3), 351-368.
- 433 Esmat, A.Y., Said, M.M., Soliman, A.A., El-Masry, K.S.H., Badiea, E.A., 2013. Bioactive  
434 compounds, antioxidant potential, and hepatoprotective activity of sea cucumber (*Holothuria atra*)  
435 against thioacetamide intoxication in rats. Nutrition 29(1), 258-267.
- 436 Essar, D.W., Eberly, L., Hadero, A., Crawford, I.P., 1990. Identification and characterization of genes  
437 for a second anthranilate synthase in *Pseudomonas aeruginosa*: interchangeability of the two  
438 anthranilate synthases and evolutionary implications. J. Bacteriol. 172(2), 884-900.
- 439 Evans, E.A., Kawli, T., Tan, M.W., 2008. *Pseudomonas aeruginosa* suppresses host immunity by  
440 activating the DAF-2 insulin-like signaling pathway in *Caenorhabditis elegans*. PLoS Pathog. 4(10),  
441 e1000175.
- 442 Fatin, S.N., Boon-Khai, T., Shu-Chien, A.C., Khairuddean, M., Al-Ashraf Abdullah, A., 2017. A  
443 Marine Actinomycete Rescues *Caenorhabditis elegans* from *Pseudomonas aeruginosa* Infection  
444 through Restitution of Lysozyme 7. Front. Microbiol. 8, 2267.
- 445 Garsin, D.A., Villanueva, J.M., Begun, J., Kim, D.H., Sifri, C.D., Calderwood, S.B., Ruvkun, G.,  
446 Ausubel, F.M., 2003. Long-lived *C. elegans* daf-2 mutants are resistant to bacterial pathogens.  
447 Science 300(5627), 1921.
- 448 Hamill, P., Brown, K., Jenssen, H., Hancock, R.E.W., 2008. Novel anti-infectives: is host defence the  
449 answer? Curr. Opin. Biotechnol. 19(6), 628-636.
- 450 Hasko, G., Sitkovsky, M.V., Szabo, C., 2004. Immunomodulatory and neuroprotective effects of  
451 inosine. Trends in Pharmacological Sciences 25(3), 152-157.
- 452 Ibrahim, H.A.H., 2012. Antibacterial carotenoids of three *Holothuria* species in Hurghada, Egypt.  
453 Egypt J. Aquat. Res. 38(3), 185-194.
- 454 Janakiram, N.B., Mohammed, A., Rao, C.V., 2015. Sea Cucumbers Metabolites as Potent  
455 Anti-Cancer Agents. Mar. Drugs 13(5), 2909-2923.
- 456 Jattujan, P., Chalorak, P., Siangcham, T., Sangpairoj, K., Nobsathian, S., Poomtong, T., Sobhon, P.,  
457 Meemon, K., 2018. *Holothuria scabra* extracts possess anti-oxidant activity and promote stress  
458 resistance and lifespan extension in *Caenorhabditis elegans*. Experimental Gerontology 110,  
459 158-171.
- 460 Jin, X., Shepherd, R.K., Duling, B.R., Linden, J., 1997. Inosine binds to A3 adenosine receptors and  
461 stimulates mast cell degranulation. J. Clin. Invest. 100(11), 2849-2857.



- 462 Kale, V., Freysdottir, J., Paulsen, B.S., Friðjónsson, Ó.H., Óli Hreggviðsson, G., Omarsdottir, S.,  
463 2013. Sulphated polysaccharide from the sea cucumber *Cucumaria frondosa* affect maturation of  
464 human dendritic cells and their activation of allogeneic CD4(+) T cells in vitro. *Bioact. Carbohydr.*  
465 *Dietary Fibre* 2(2), 108-117.
- 466 Kandasamy, S., Khan, W., Evans, F., Critchley, A.T., Prithiviraj, B., 2012. Tasco<sup>(R)</sup>: a product of  
467 *Ascophyllum nodosum* enhances immune response of *Caenorhabditis elegans* against *Pseudomonas*  
468 *aeruginosa* infection. *Mar. Drugs* 10(1), 84-105.
- 469 Kim, J., Park, W., 2013. Indole inhibits bacterial quorum sensing signal transmission by interfering  
470 with quorum sensing regulator folding. *Microbiology* 159(12), 2616-2625.
- 471 Kim, W., Hendricks, G.L., Lee, K., Mylonakis, E., 2017. An update on the use of *C. elegans* for  
472 preclinical drug discovery: screening and identifying anti-infective drugs. *Expert Opin. Drug Discov.*  
473 12(6), 625-633.
- 474 Kipnis, E., Sawa, T., Wiener-Kronish, J., 2006. Targeting mechanisms of *Pseudomonas aeruginosa*  
475 pathogenesis. *Med. Mal. Infect.* 36(2), 78-91.
- 476 Kong, C., Yehye, W.A., Abd Rahman, N., Tan, M.W., Nathan, S., 2014. Discovery of potential  
477 anti-infectives against *Staphylococcus aureus* using a *Caenorhabditis elegans* infection model. *BMC*  
478 *Complement. Altern. Med.* 14, 4.
- 479 Kulshreshtha, G., Borza, T., Rathgeber, B., Stratton, G.S., Thomas, N.A., Critchley, A., Hafting, J.,  
480 Prithiviraj, B., 2016. Red Seaweeds *Sarcodiotheca gaudichaudii* and *Chondrus crispus* down  
481 Regulate Virulence Factors of *Salmonella* Enteritidis and Induce Immune Responses in  
482 *Caenorhabditis elegans*. *Front. Microbiol.* 7, 421.
- 483 Lawrence, A.J., Afifi, R., Ahmed, M., Khalifa, S., Paget, T., 2010. Bioactivity as an Options Value of  
484 Sea Cucumbers in the Egyptian Red Sea. *Conserv. Biol.* 24(1), 217-225.
- 485 Lee, J., Attila, C., Cirillo, S.L.G., Cirillo, J.D., Wood, T.K., 2009. Indole and 7-hydroxyindole  
486 diminish *Pseudomonas aeruginosa* virulence. *Microbiol. Biotechnol.* 2(1), 75-90.
- 487 Lee, J.-H., Kim, Y.-G., Cho, M.H., Kim, J.-A., Lee, J., 2012. 7-fluoroindole as an antivirulence  
488 compound against *Pseudomonas aeruginosa*. *Fems Microbiol Lett* 329(1), 36-44.
- 489 Li, W.H., Chang, C.H., Huang, C.W., Wei, C.C., Liao, V.H., 2014. Selenite enhances immune  
490 response against *Pseudomonas aeruginosa* PA14 via SKN-1 in *Caenorhabditis elegans*. *PLoS One*  
491 9(8), e105810.
- 492 Liu, J., Hafting, J., Critchley, A.T., Banskota, A.H., Prithiviraj, B., 2013. Components of the  
493 cultivated red seaweed *Chondrus crispus* enhance the immune response of *Caenorhabditis elegans* to  
494 *Pseudomonas aeruginosa* through the pmk-1, daf-2/daf-16, and skn-1 pathways. *Appl. Environ.*  
495 *Microb.* 79(23), 7343-7350.
- 496 Mallo, G.V., Kurz, C.L., Couillault, C., Pujol, N., Granjeaud, S., Kohara, Y., Ewbank, J.J., 2002.  
497 Inducible antibacterial defense system in *C. elegans*. *Current Biology* 12(14), 1209-1214.
- 498 Maria, C., Gregory, M.S., Michael, P., 2017. *C. elegans* as Model for Drug Discovery. *Current Topics*  
499 *in Medicinal Chemistry* 17(18), 2067-2076.
- 500 Molinski, T.F., Dalisay, D.S., Lievens, S.L., Saludes, J.P., 2009. Drug development from marine  
501 natural products. *Nat. Rev. Drug Discov.* 8(1), 69-85.
- 502 Mourão, P.A.S., Guimarães, M.A.M., Mulloy, B., Thomas, S., Gray, E., 1998. Antithrombotic  
503 activity of a fucosylated chondroitin sulphate from echinoderm: sulphated fucose branches on the  
504 polysaccharide account for its antithrombotic action. *Brit. J. Haematol.* 101(4), 647-652.



- 505 Moy, T.I., Ball, A.R., Anklesaria, Z., Casadei, G., Lewis, K., Ausubel, F.M., 2006. Identification of  
506 novel antimicrobials using a live-animal infection model. *Proc. Natl. Acad. Sci. U.S.A.* 103(27),  
507 10414-10419.
- 508 Murphy, C.T., McCarroll, S.A., Bargmann, C.I., Fraser, A., Kamath, R.S., Ahringer, J., Li, H.,  
509 Kenyon, C., 2003. Genes that act downstream of DAF-16 to influence the lifespan of *Caenorhabditis*  
510 *elegans*. *Nature* 424, 277.
- 511 Naik, D.N., Wahidullah, S., Meena, R.M., 2013. Attenuation of *Pseudomonas aeruginosa* virulence  
512 by marine invertebrate-derived *Streptomyces* sp. *Lett. Appl. Microbiol.* 56(3), 197-207.
- 513 Netz, N., Opatz, T., 2015. Marine Indole Alkaloids. *Mar. Drugs* 13(8), 4814-4914.
- 514 Nishikawa, Y., Furukawa, A., Shiga, I., Muroi, Y., Ishii, T., Hongo, Y., Takahashi, S., Sugawara, T.,  
515 Koshino, H., Ohnishi, M., 2015. Cytoprotective Effects of Lysophospholipids from Sea Cucumber  
516 *Holothuria atra*. *PLOS ONE* 10(8), e0135701.
- 517 O' Toole, G.A., 2011. Microtiter dish biofilm formation assay. *J. Vis. Exp.*(47), e2437.
- 518 Papa, R., Selan, L., Parrilli, E., Tilotta, M., Sannino, F., Feller, G., Tutino, M.L., Artini, M., 2015.  
519 Anti-Biofilm Activities from Marine Cold Adapted Bacteria Against *Staphylococci* and  
520 *Pseudomonas aeruginosa*. *Front. Microbiol.* 6, 1333.
- 521 Papaioannou, E., Wahjudi, M., Nadal-Jimenez, P., Koch, G., Setroikromo, R., Quax, W.J., 2009.  
522 Quorum-Quenching Acylase Reduces the Virulence of *Pseudomonas aeruginosa* in a *Caenorhabditis*  
523 *elegans* Infection Model. *Antimicrob Agents Chemother.* 53(11), 4891-4897.
- 524 Parisien, A., Allain, B., Zhang, J., Mandeville, R., Lan, C.Q., 2008. Novel alternatives to antibiotics:  
525 bacteriophages, bacterial cell wall hydrolases, and antimicrobial peptides. *J. Appl. Microbiol.* 104(1),  
526 1-13.
- 527 Prithiviraj, B., Bais, H.P., Weir, T., Suresh, B., Najarro, E.H., Dayakar, B.V., Schweizer, H.P.,  
528 Vivanco, J.M., 2005. Down regulation of virulence factors of *Pseudomonas aeruginosa* by salicylic  
529 acid attenuates its virulence on *Arabidopsis thaliana* and *Caenorhabditis elegans*. *Infect. Immun.*  
530 73(9), 5319-5328.
- 531 Rahme, L.G., Stevens, E.J., Wolfort, S.F., Shao, J., Tompkins, R.G., Ausubel, F.M., 1995. Common  
532 virulence factors for bacterial pathogenicity in plants and animals. *Science* 268(5219), 1899-1902.
- 533 Ridzwan, B.H., Kaswandi, M.A., Azman, Y., Fuad, M., 1995. Screening for antibacterial agents in  
534 three species of sea cucumbers from coastal areas of Sabah. *Gen. Pharmacol.* 26(7), 1539-1543.
- 535 Rudrappa, T., Bais, H.P., 2008. Curcumin, a known phenolic from *Curcuma longa*, attenuates the  
536 virulence of *Pseudomonas aeruginosa* PAO1 in whole plant and animal pathogenicity models. *J.*  
537 *Agric. Food Chem.* 56(6), 1955-1962.
- 538 Saad, D.Y., Baiomy, A.A., Mansour, A.A., 2016. Antiseptic effect of sea cucumber (*Holothuria atra*)  
539 against multi-organ failure induced by sepsis: Molecular and histopathological study. *Exp. Ther.*  
540 *Med.* 12(1), 222-230.
- 541 Saito, M., Kunisaki, N., Urano, N., Kimura, S., 2002. Collagen as the Major Edible Component of  
542 Sea Cucumber (*Stichopus japonicus*). *J. Food Sci.* 67(4), 1319-1322.
- 543 Shi, S., Feng, W., Hu, S., Liang, S., An, N., Mao, Y., 2016. Bioactive compounds of sea cucumbers  
544 and their therapeutic effects. *Chin. J. Oceanol. Limn.* 34(3), 549-558.
- 545 Song, M., Park, D.K., Cho, M., Park, H.-J., 2013. Anti-inflammatory and anti-allergic activities of sea  
546 cucumber (*Stichopus japonicus*) extract. *Food Sci. Biotechnol.* 22(6), 1661-1666.

547 Song, Y., Jin, S.-J., Cui, L.-H., Ji, X.-J., Yang, F.-G., 2013. Immunomodulatory Effect of *Stichopus*  
548 *japonicus* Acid Mucopolysaccharide on Experimental Hepatocellular Carcinoma in Rats. *Molecules*  
549 18(6), 7179.

550 Squiban, B., Kurz, C.L., 2011. *C. elegans*: an all in one model for antimicrobial drug discovery. *Curr.*  
551 *Drug Targets* 12(7), 967-977.

552 Tan, M.W., Mahajan-Miklos, S., Ausubel, F.M., 1999. Killing of *Caenorhabditis elegans* by  
553 *Pseudomonas aeruginosa* used to model mammalian bacterial pathogenesis. *Proc. Natl. Acad. Sci.*  
554 *U.S.A.* 96(2), 715-720.

555 Taylor, P.K., Yeung, A.T., Hancock, R.E., 2014. Antibiotic resistance in *Pseudomonas aeruginosa*  
556 biofilms: towards the development of novel anti-biofilm therapies. *J. Biotechnol.* 191, 121-130.

557 Utari, P.D., Quax, W.J., 2013. *Caenorhabditis elegans* reveals novel *Pseudomonas aeruginosa*  
558 virulence mechanism. *Trends in Microbiology* 21(7), 315-316.

559 Vuki, V.C., Viala, F., 1990. Shrinkage and weight loss of the nine commercial species of holothurians  
560 from Fijian waters. *SPC Fisheries Newsletter* 51, 21-29.

561 Wang, H., Yang, S., Wang, Y., Jiang, T., Li, S., Lv, Z., 2017. Immunoenhancement Effects of  
562 Glycosaminoglycan from *Apostichopus japonicus*: In Vitro and In Cyclophosphamide-Induced  
563 Immunosuppressed Mice Studies. *Mar. Drugs* 15(11), 347.

564 Yayan, J., Ghebremedhin, B., Rasche, K., 2015. Antibiotic Resistance of *Pseudomonas aeruginosa* in  
565 Pneumonia at a Single University Hospital Center in Germany over a 10-Year Period. *PLoS One*  
566 10(10), e0139836.

567 Zhu, J., Cai, X., Harris, T.L., Gooyit, M., Wood, M., Lardy, M., Janda, K.D., 2015. Disarming  
568 *Pseudomonas aeruginosa* virulence factor LasB by leveraging a *Caenorhabditis elegans* infection  
569 model. *Chem. Biol.* 22(4), 483-491.

570

571

1 **Table 1.** Aspidospermatidine and inosine, the main compounds identified in F3  
 2 fraction of *Holothuria atra*

| ESI-MS<br>RT (min) | Detected ion<br>( <i>m/z</i> ) [M-H] <sup>-</sup> | Fragments                            | Molecular Formula                                             | Identification     |
|--------------------|---------------------------------------------------|--------------------------------------|---------------------------------------------------------------|--------------------|
| 17.764             | 266.1789                                          | 266, 144,<br>136, 130<br>268, 215,   | C <sub>18</sub> H <sub>22</sub> N <sub>2</sub>                | Aspidospermatidine |
| 18.395             | 268.194                                           | 185, 136,<br>133, 109, 93,<br>82, 54 | C <sub>10</sub> H <sub>12</sub> N <sub>4</sub> O <sub>5</sub> | Inosine            |

3

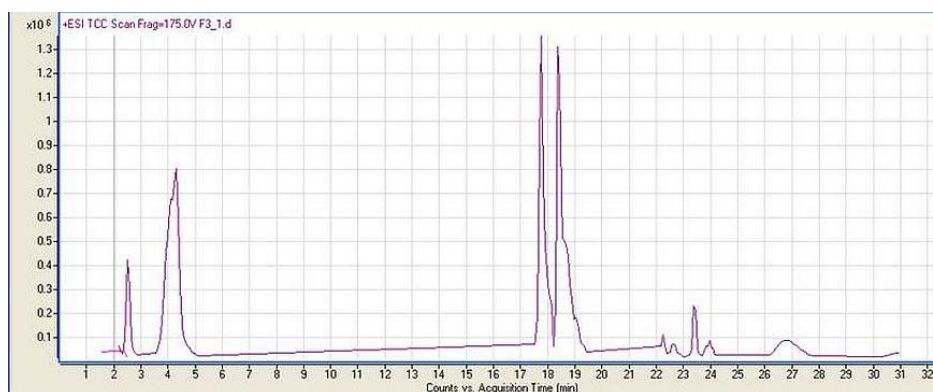

4

5

6

7

8

9 **Supplementary 1**

10 The antimicrobial effect of *Holothuria atra* on *P. aeruginosa* PA14 as determined by Minimum  
 11 Inhibitory Concentration (MIC) test\*.

12

| Samples                             | Concentration (µg/mL) |    |     |     |      |
|-------------------------------------|-----------------------|----|-----|-----|------|
|                                     | 25                    | 50 | 100 | 500 | 1000 |
| <i>Holothuria atra</i> -methanol    | -                     | -  | -   | -   | -    |
| <i>Holothuria atra</i> -fraction F3 | -                     | -  | -   | -   | -    |
| Streptomycin**                      |                       |    | +   |     |      |

13 \* + denotes inhibition; - denotes no inhibition of PA14 growth

14 \*\* 100 µg/ml streptomycin was used as control

15

16

17

18

19

20

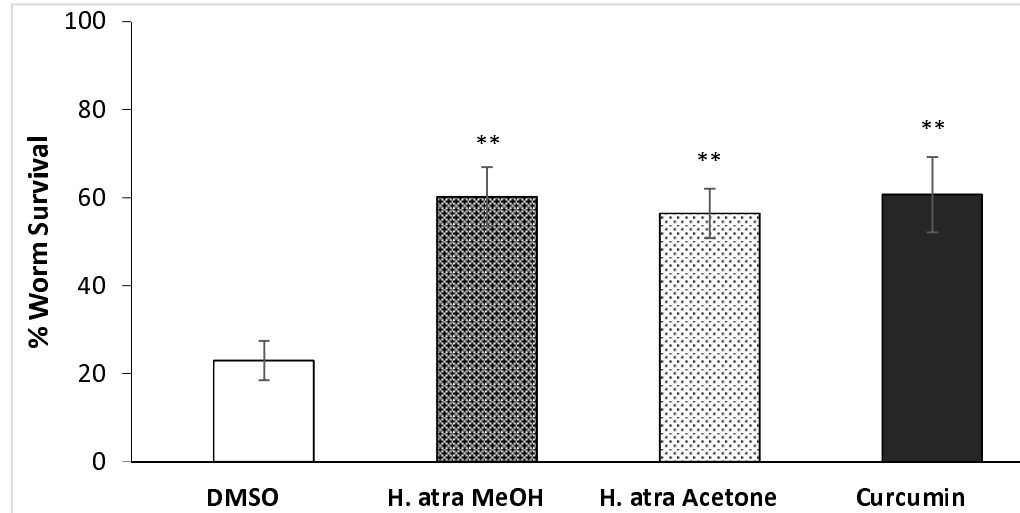

1

2

3

4

5

6

7

8

9

10

11

12

13

14

15

16

17

18

**Figure 1.** Improved survival of *P. aeruginosa* PA14-infected *C. elegans* at 48 hours after treatment with *Holothuria atra* extracts (200  $\mu$ g/mL). The methanol extract showed the highest percentage of survival. Data were analyzed using Student's *t*-test where \*\* denotes significance at  $p < 0.01$  when compared to 0.5% DMSO treatment. Curcumin was used as positive control.

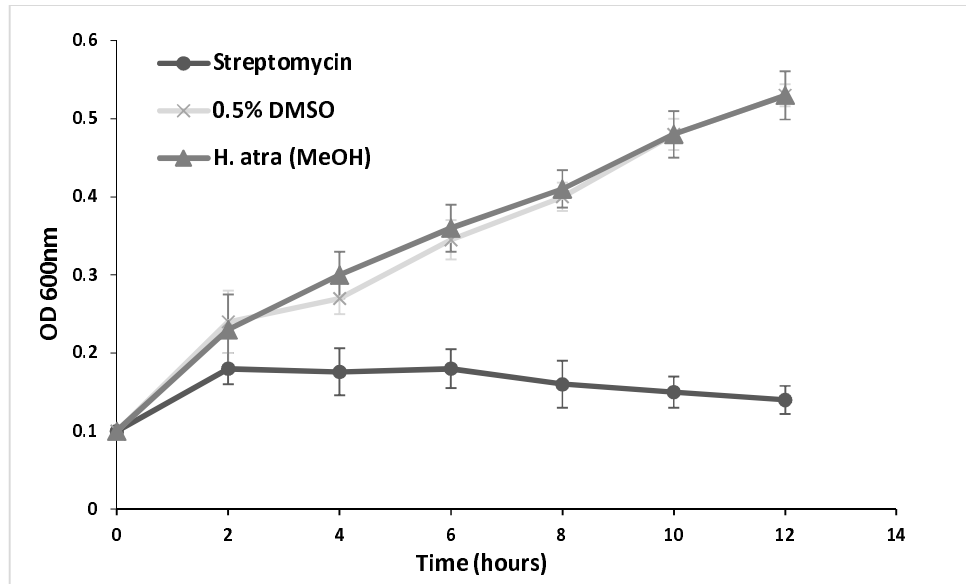

19

20

21 **Figure 2.** Growth rate of *P. aeruginosa* PA14 in the presence of 200  $\mu\text{g/mL}$   
22 *Holothuria atra* methanolic extract was comparable to 0.5% DMSO treatment while  
23 streptomycin (100  $\mu\text{g/mL}$ ) reduced bacterial proliferation.

24

25

26

27

28

29

30

31

32

33

34

35

36

37

38

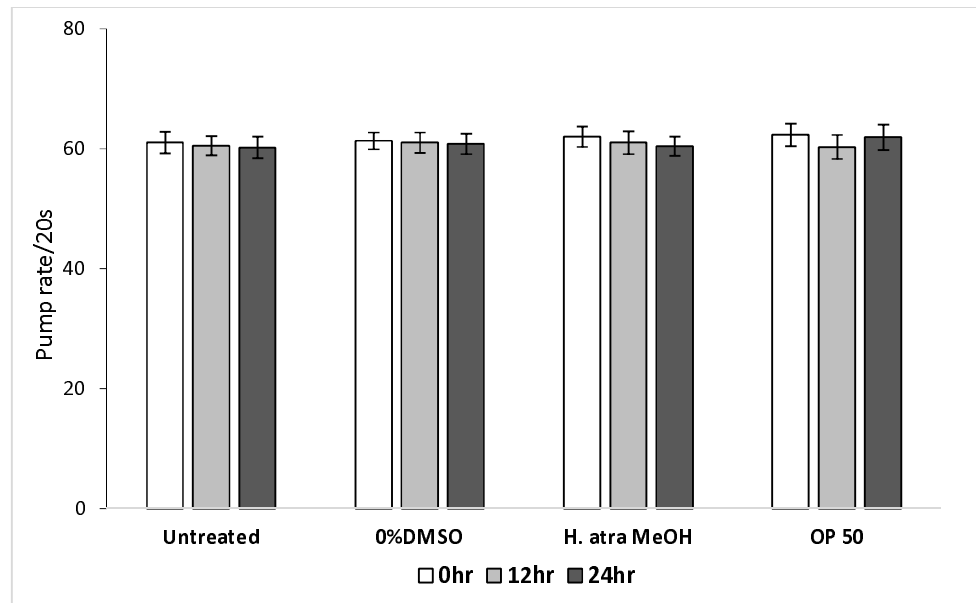

39  
40  
41  
42  
43  
44  
45  
46  
47  
48  
49  
50  
51  
52  
53  
54  
55  
56  
57  
58  
59  
60  
61  
62  
63  
64  
65  
66  
67  
68  
69  
70  
71  
72  
73

**Figure 3.** Pharyngeal pumping rate of *C. elegans* fed OP-50, fed PA14 (untreated), fed PA14 (0.5% DMSO treated) and fed PA14 (*Holothuria atra* methanol extract at 200  $\mu\text{g}/\text{mL}$ ) at 0, 12 or 24hr after treatment.

74  
75

A

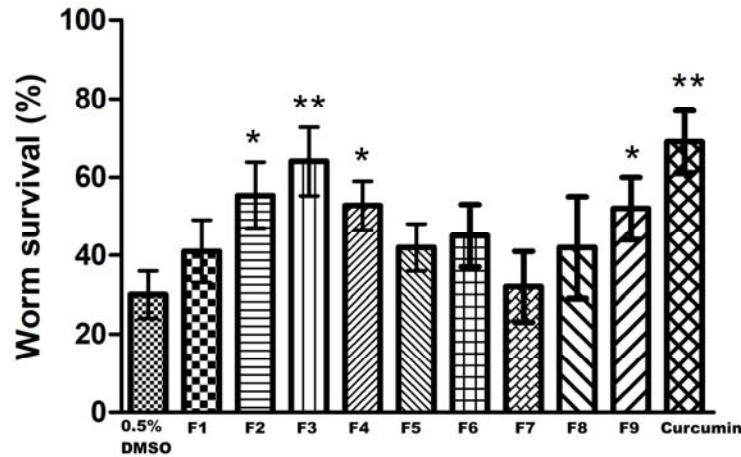

76

77

B

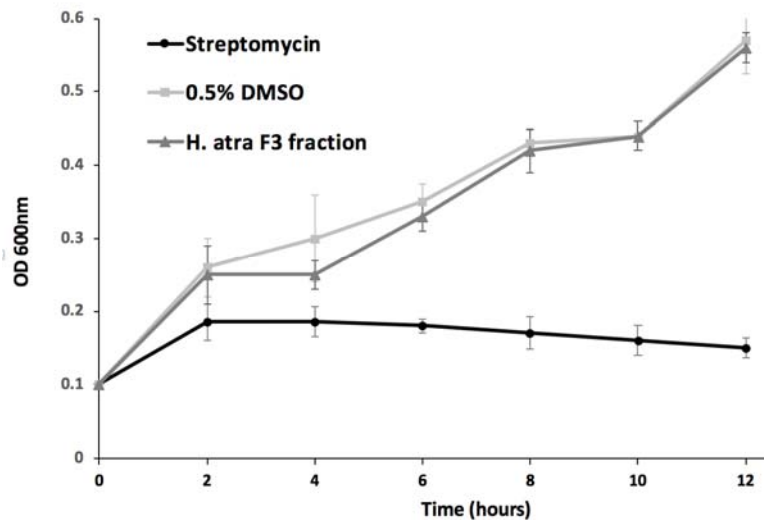

78

79

80

81

82

83

84

85

86

87

88

89

90

91

92

**Figure 4.** a) Survival of *P. aeruginosa* PA14-infected *C. elegans* at 48 hours after treatment with respective *Holothuria atra* fractions. The F3 fraction showed the highest percentage of survival. Data were analyzed using Student's *t*-test where \* and \*\* denotes significance at  $p < 0.05$  and  $p < 0.01$  respectively when compared to 0.5% DMSO treatment. Curcumin, used as positive control, also prolonged worm survival significantly. b) Growth rate of *P. aeruginosa* PA14 in the presence of 200 µg/mL *Holothuria atra* fraction F3 was comparable to 0.5% DMSO treatment (b). Streptomycin (100 µg/mL) reduced bacterial proliferation.



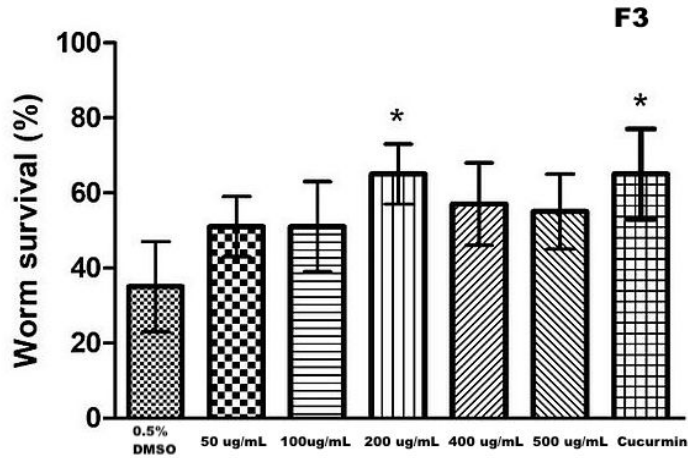

93 **Figure 5.** Dose dependent response of *P. aeruginosa* PA14-infected *C. elegans* at  
94 48 hours after treatment with *Holothuria atra* fraction F3. Data were analyzed using  
95 Student's t-test where \* at  $p < 0.05$  when compared to 0.5% DMSO treatment.  
96 Curcumin, as positive control, also prolonged worm survival significantly.

97

98

99

100

101

102

103

104

105

106

107

108

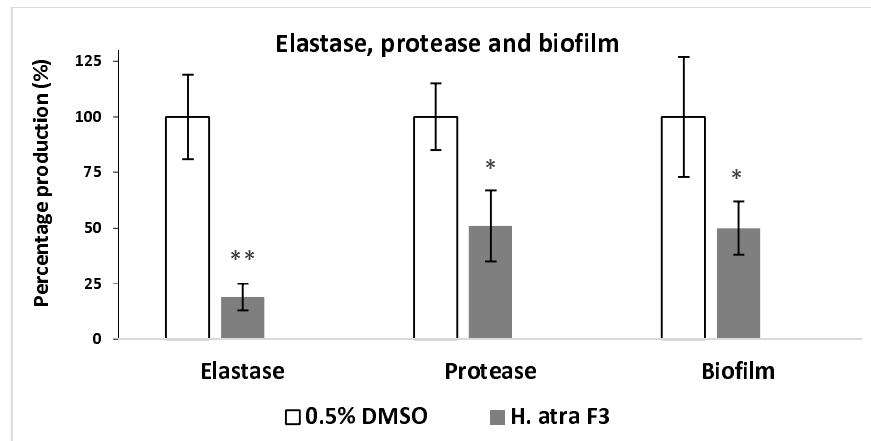

109

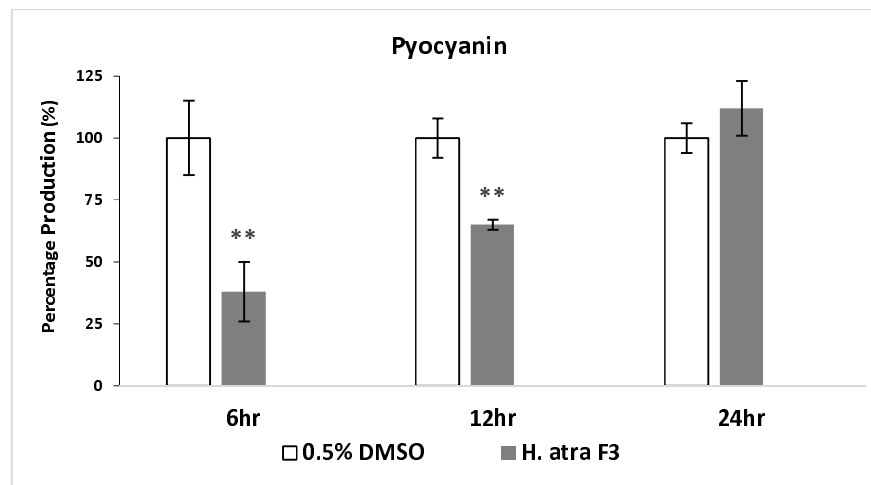

110

111 **Figure 6** Effect of *Holothuria atra* F3 fraction on production of *P. aeruginosa*  
112 PA14 virulence factors (a) Reduced production elastase, protease and biofilm at 24  
113 hr after exposure to F3 (b) Reduced pyocyanin production at 6 and 12 hr after  
114 exposure. Data were analyzed using Student's *t*-test where \* and \*\* denotes  
115 significance at  $p<0.05$  and  $p<0.01$  respectively when compared to 0.5% DMSO  
116 treatment.

117

118

119

120

121

122

123

124

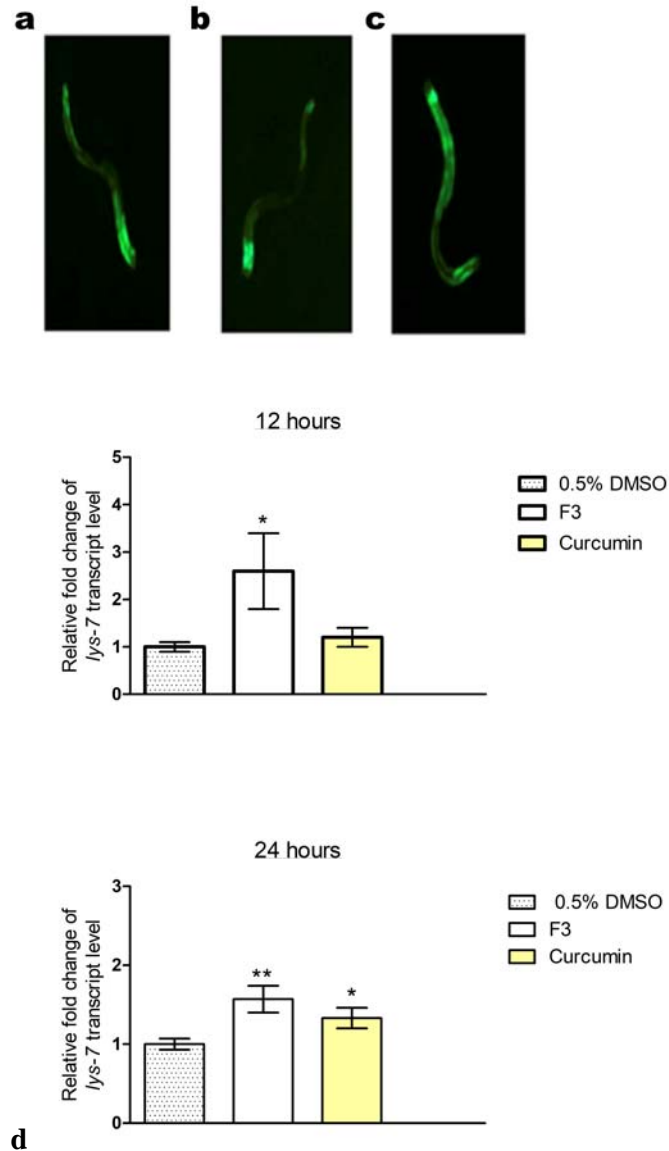

125 **Figure 7.** *Holothuria atra* restore *lys-7* expression in *P. aeruginosa* PA14 infected  
126 *C. elegans*. Representative fluorescence micrographs (60x magnification) of  
127 transgenic *lys-7::GFP* worms (a) fed with *E. coli* OP50 (b) infected with *P.*  
128 *aeruginosa* PA14 and treatment with 0.5% DMSO (c) infected with *P. aeruginosa*  
129 PA14 and treatment with F3. Images were captured at 12 hr after treatment. (d)  
130 qPCR of *C. elegans lys-7* in PA14 infected worms treated with 0.5% DMSO, *H. atra*  
131 F3 fraction or curcumin at 12 or 24 hrs. Data were analyzed using Student's *t*-test  
132 where \* and \*\* denotes significance at  $p < 0.05$  and  $p < 0.01$  respectively when  
133 normalized to 0.5% DMSO treatment.

134

135
